# Supplementary material for: Preparation and energy storage application of a long-life and high rate performance pseudocapacitive COF material linked with –NH– bonds
Source: Royal Society of Chemistry journal article supplement (doi:10.1039/c8nj01942h), 2018-01-01
Supplement: c8nj01942h1.pdf [file c8nj01942h1.pdf]

Submitted to New Journal of Chemistry

## Electronic Supplementary Material

### Preparation and energy storage application of a long-life and high-rate performing pseudocapacitive COF material linked with -NH- bonds

Rui Xue, Hao Guo\*, Liguo Yue, Ting Wang, Mingyue Wang, Qi Li, Hui Liu, Wu Yang\*

(Key Lab of Bioelectrochemistry and Environmental Analysis of Gansu Province, Key Lab of Eco-Environments Related Polymer Materials of MOE, College of Chemistry and Chemical Engineering, Northwest Normal University, Lanzhou 730070, P R China.)

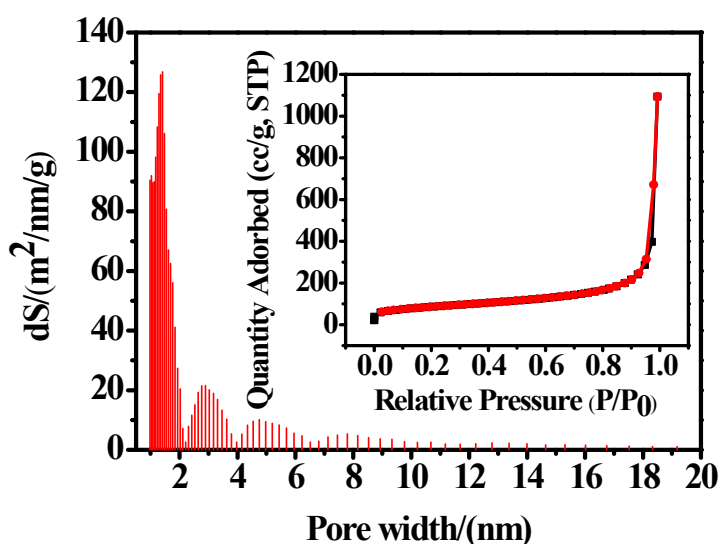

**Figure S1** Pore size distribution of NWNU-COF-1. **Inset:** N<sub>2</sub> adsorption and desorption isotherm for NWNU-COF-1 measured at 77.350 K.

\*Corresponding author.

E-mail address : xbsfda123@126.com(W. Yang), haoguo12@126.com(H. Guo).

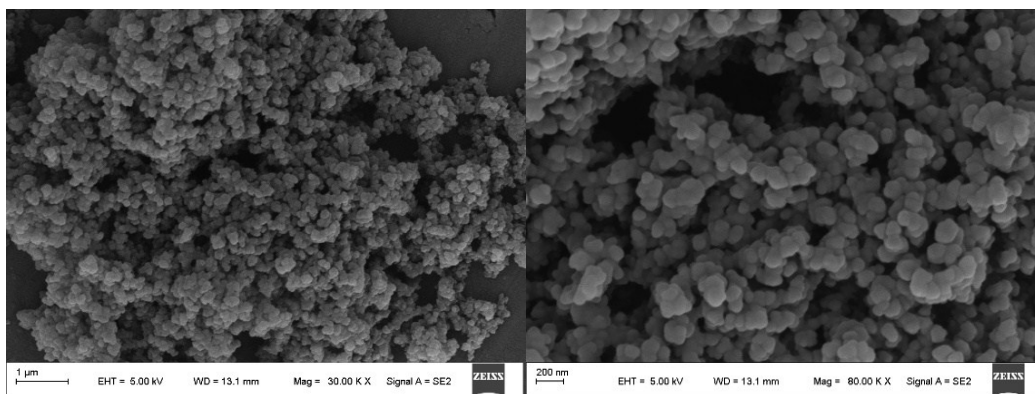

Figure S2 SEM images of NWNu-COF-1

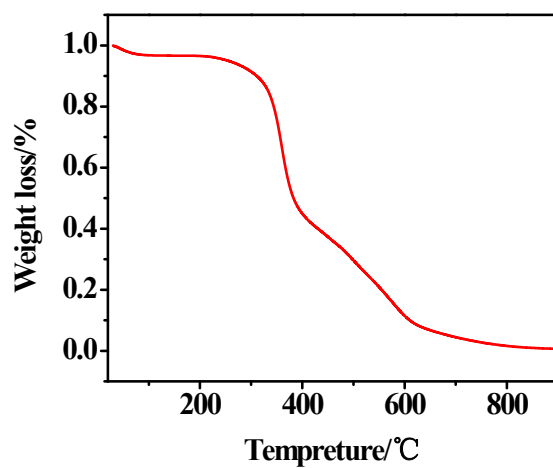

Figure S3 TGA curve of NWNu-COF-1.

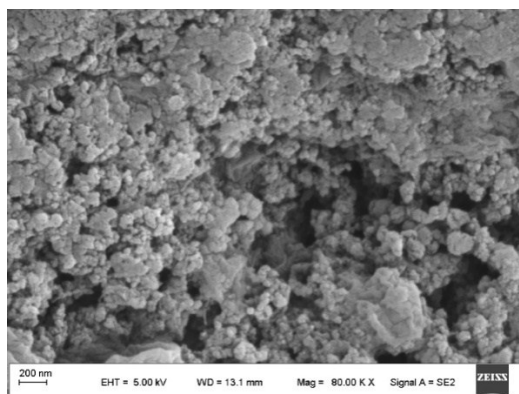

Figure S4 SEM images of NWNu-COF-1 after 20000 cycles.

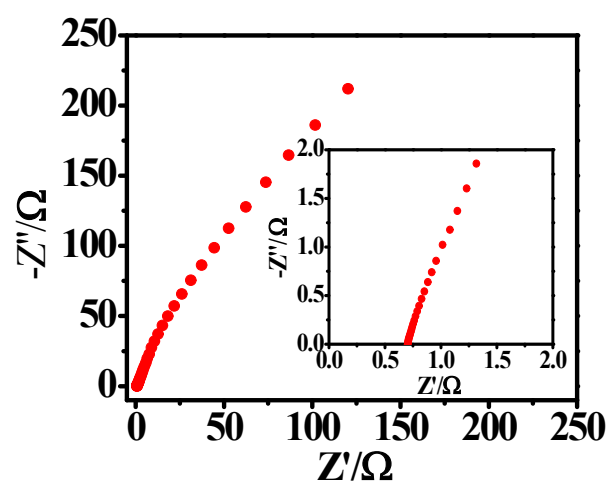

**Figure S5** Nyquist plots of NWNu-COF-1. **Inset:** the expanded high frequency region.
